# Supplementary material for: Novel sulfonate-containing halogen-free flame-retardants: effect of ternary and quaternary sulfonates centered on adamantane on the properties of polycarbonate composites
Source: Royal Society of Chemistry journal article supplement (doi:10.1039/c7ra06504c), 2017-01-01
Supplement: c7ra06504c1.pdf [file c7ra06504c1.pdf]

# Novel sulfonate-containing halogen-free flame-retardants: effect of ternary and quaternary sulfonates centered on adamantane on the properties of polycarbonate composites

Dongyu Zhu, Jianwei Guo,\* Jiaying Xian, Shuqin Fu

## 1.1 Characterization of 1,3,5-triphenyladamantane and 1,3,5-tri(phenyl-4-sulfonylchloride) adamantane

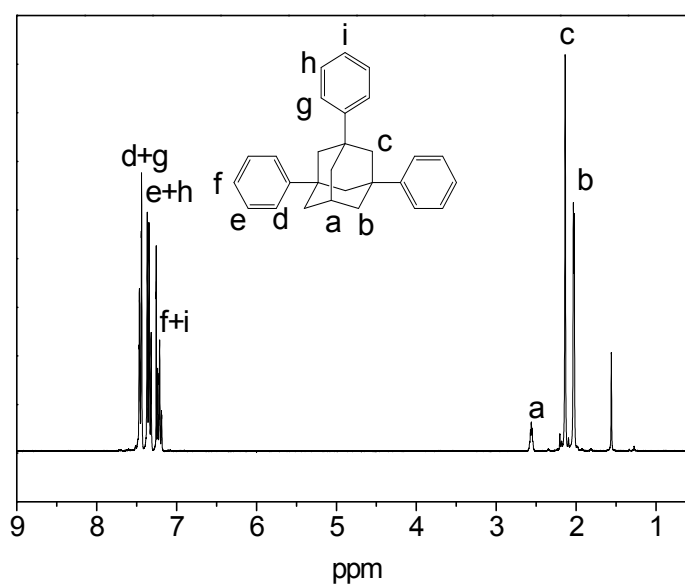

Fig. S1 <sup>1</sup>H NMR spectrum of 1,3,5-triphenyladamantane with CDCl<sub>3</sub> as solvent

School of Chemical Engineering and Light Industry, Guangdong University of Technology, Guangzhou 510006, China

E-mail address: guojw@gdut.edu.cn

† Electronic supplementary information (ESI) available.

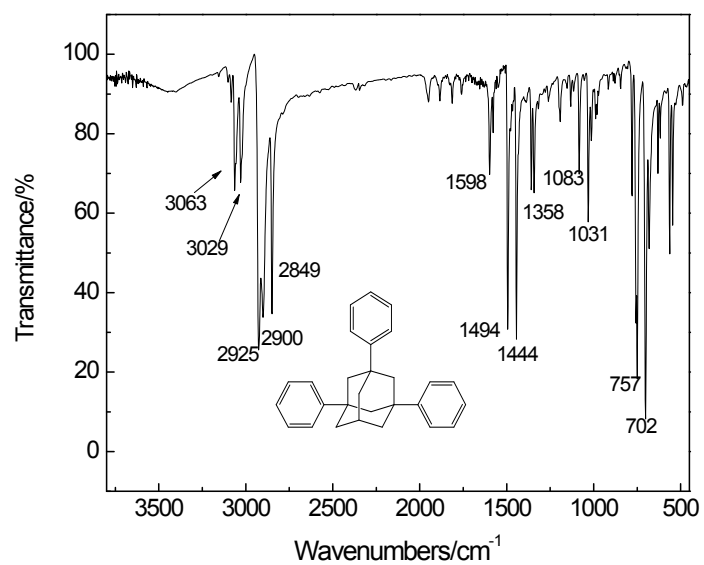

Fig. S2 FTIR spectrum of 1,3,5-triphenyladamantane

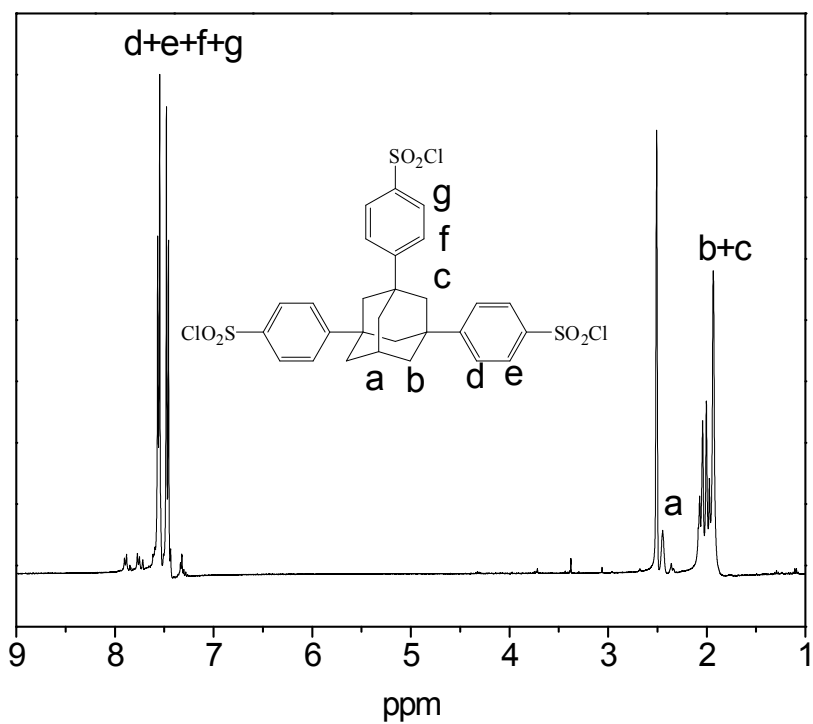

Fig. S3  $^1\text{H}$  NMR spectrum of 1,3,5-tri(phenyl-4-sulfonylchloride)adamantane with  $\text{DMSO-d}_6$  as solvent

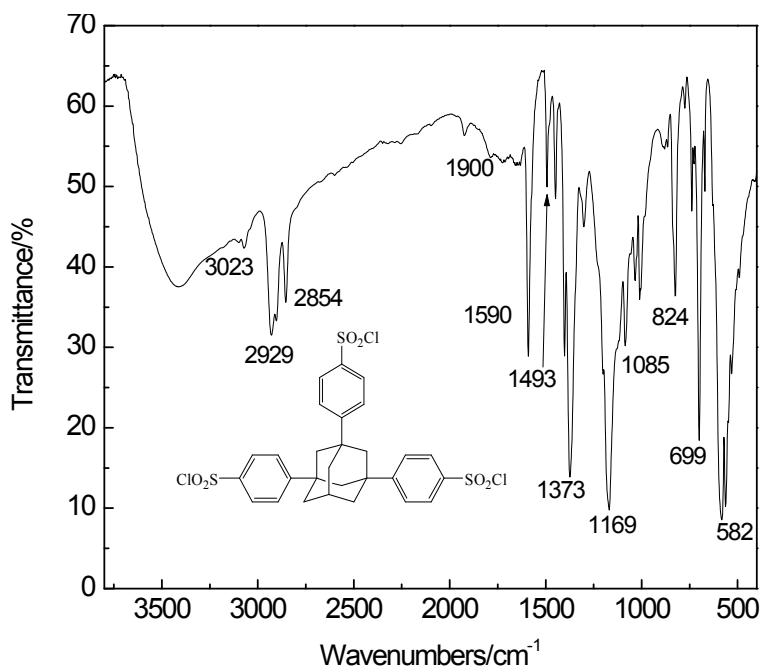

Fig. S4 FTIR spectrum of 1,3,5-tri(phenyl-4-sulfonylchloride) adamantane

## 1.2 Characterization of 1,3,5,7-tetraphenyladamantane and 1,3,5,7-tetrakis(phenyl-4-sulfonylchloride)adamantane

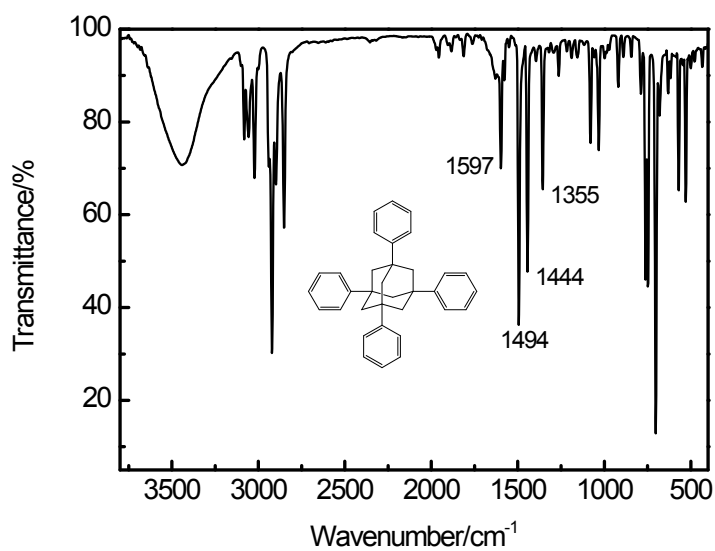

Fig. S5 FTIR spectrum of 1,3,5,7-tetraphenyladamantane

We didn't obtain the  $^1\text{H}$  NMR spectrum of 1,3,5,7-tetraphenyladamantane because of its insolubility in general solvents.

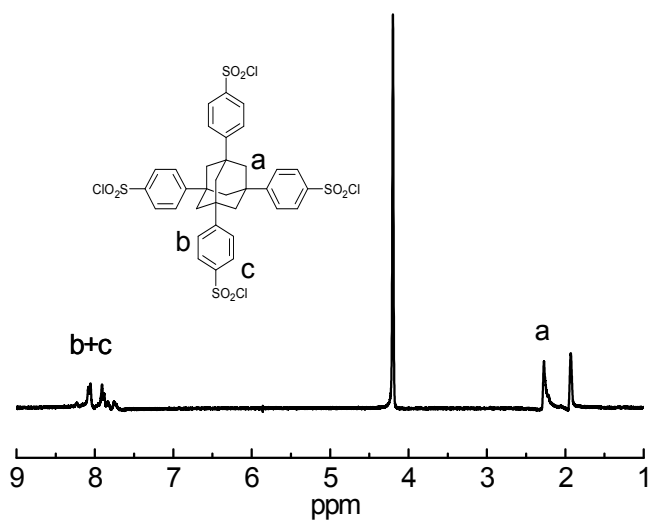

Fig. S6  $^1\text{H}$  NMR spectrum of 1,3,5,7- tetrakis(phenyl-4-sulfonylchloride)adamantane with  $\text{DMSO-d}_6$  as solvent

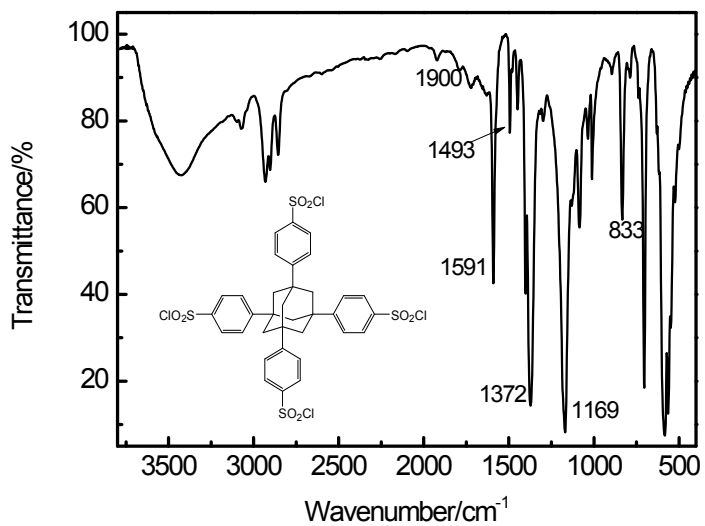

Fig. S7 FTIR spectrum of 1,3,5,7- tetrakis(phenyl-4-sulfonylchloride)adamantane

## 2. Thermal degradation kinetics

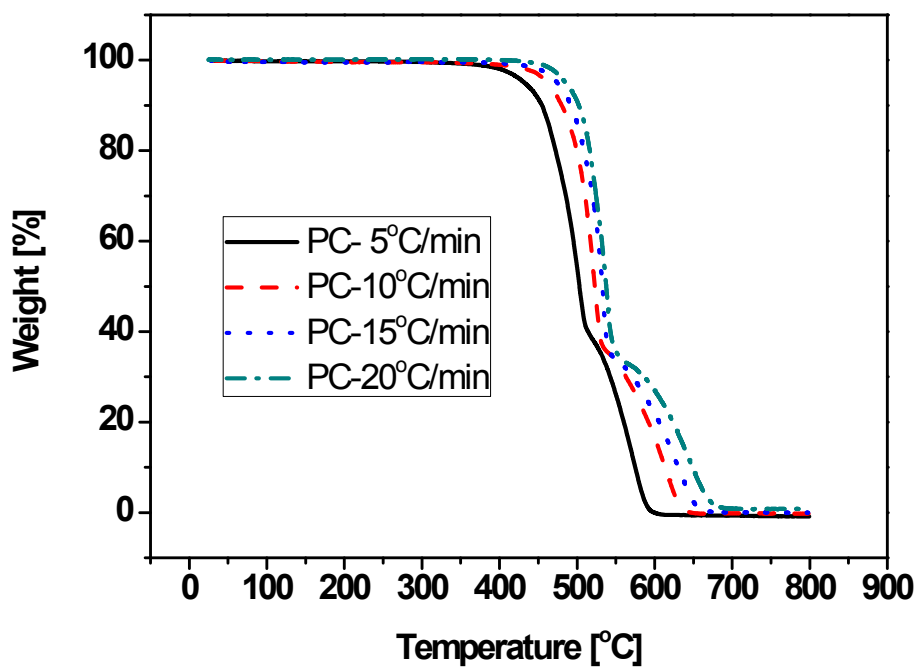

Fig. S8 TG curves of PC under different heating flow rates. PC/AS<sub>4</sub>(0.08%)

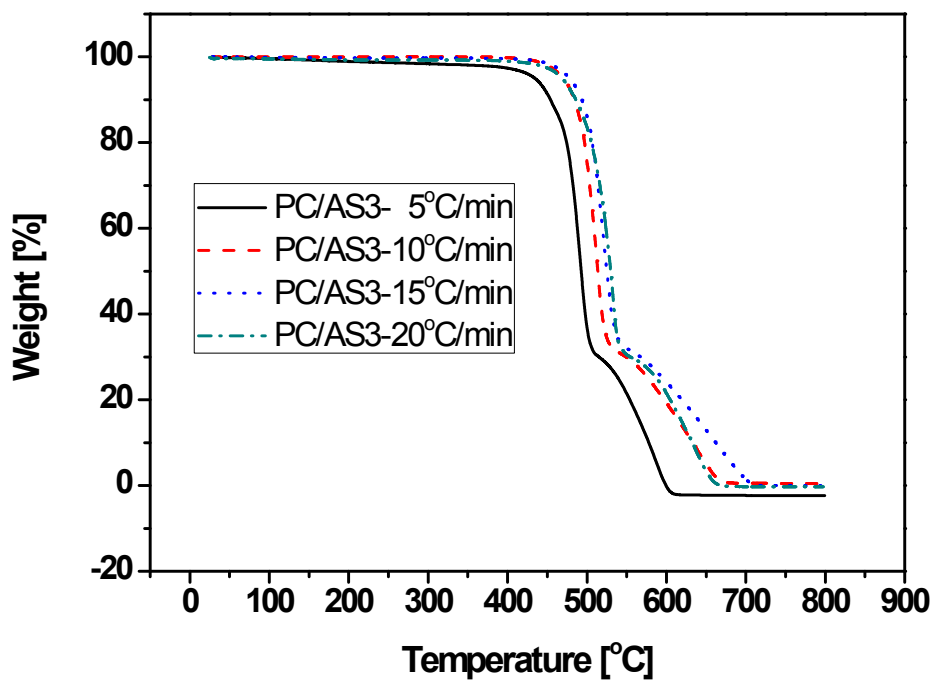

Fig. S9 TG curves of PC/AS<sub>3</sub>(0.1%) under different heating flow rates.

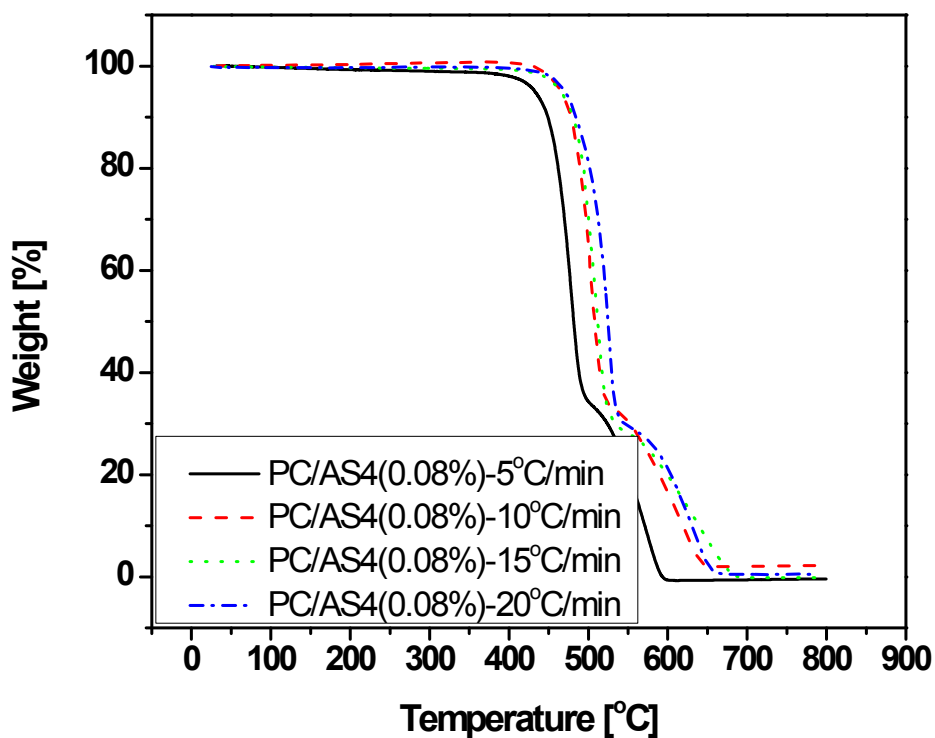

Fig. S10 TG curves of PC/AS<sub>4</sub>(0.08%) under different heating flow rates.

Table S1. The calculated activation energy data of PC

| PC          |                                |        |        |        |          |        |            |                        |
|-------------|--------------------------------|--------|--------|--------|----------|--------|------------|------------------------|
| $\alpha/\%$ | $\beta/(\text{°C}/\text{min})$ |        |        |        | Slop     | r      | E/(KJ/mol) | $\bar{E}/$<br>(KJ/mol) |
|             | 5                              | 10     | 15     | 20     |          |        |            |                        |
| 10          | 454.87                         | 479.85 | 491.51 | 501.64 | -6.9789  | 0.9905 | 126.9641   | 176.9138               |
| 20          | 472.07                         | 497.56 | 508.31 | 515.84 | -7.9648  | 0.9946 | 144.9001   |                        |
| 30          | 484.87                         | 508.10 | 519.91 | 524.44 | -8.8328  | 0.9922 | 160.6912   |                        |
| 40          | 495.27                         | 516.15 | 527.31 | 531.44 | -9.8866  | 0.9931 | 179.8626   |                        |
| 50          | 502.87                         | 521.24 | 532.31 | 537.04 | -10.7647 | 0.9968 | 195.8375   |                        |
| 60          | 514.07                         | 527.83 | 536.71 | 542.64 | -13.4846 | 0.9999 | 245.3194   |                        |
| 70          | 542.67                         | 561.49 | 570.71 | 585.24 | -10.1592 | 0.9914 | 184.8219   |                        |

a: conversion rate,  $\beta$ : heating rate, r: correlation coefficient, E: activation energy,  $\bar{E}$ : Average activation energy.

Table S2. The calculated activation energy data of PC/AS<sub>3</sub>(0.1%)

| PC/AS <sub>3</sub> (0.1%) |                                |        |        |        |         |        |            |                        |
|---------------------------|--------------------------------|--------|--------|--------|---------|--------|------------|------------------------|
| $\alpha/\%$               | $\beta/(\text{°C}/\text{min})$ |        |        |        | Slop    | r      | E/(KJ/mol) | $\bar{E}/$<br>(KJ/mol) |
|                           | 5                              | 10     | 15     | 20     |         |        |            |                        |
| 10                        | 456.63                         | 484.08 | 493.36 | 486.01 | -6.9789 | 0.9905 | 126.9641   | 160.7523               |
| 20                        | 475.43                         | 496.88 | 507.16 | 505.21 | -8.6703 | 0.9982 | 157.7349   |                        |
| 30                        | 483.23                         | 503.28 | 513.56 | 516.21 | -9.2803 | 0.9991 | 168.8324   |                        |
| 40                        | 488.43                         | 508.68 | 519.56 | 523.81 | -9.9528 | 0.9938 | 181.0669   |                        |
| 50                        | 493.23                         | 513.48 | 524.96 | 529.81 | -9.8185 | 0.9957 | 178.6236   |                        |
| 60                        | 498.43                         | 518.88 | 531.16 | 534.41 | -9.8923 | 0.9917 | 179.9663   |                        |
| 70                        | 523.03                         | 549.08 | 567.16 | 554.41 | -7.26   | 0.9995 | 132.0779   |                        |

a: conversion rate,  $\square\beta$ : heating rate, r: correlation coefficient, E: activation energy,  $\bar{E}$ : Average activation energy.

Table S3. The calculated activation energy data of PC/AS<sub>4</sub>(0.08%)

| PC/AS <sub>4</sub> (0.08%) |                                |        |        |        |         |         |            |                        |
|----------------------------|--------------------------------|--------|--------|--------|---------|---------|------------|------------------------|
| $\alpha/\%$                | $\beta/(\text{°C}/\text{min})$ |        |        |        | Slop    | r       | E/(KJ/mol) | $\bar{E}/$<br>(KJ/mol) |
|                            | 5                              | 10     | 15     | 20     |         |         |            |                        |
| 10                         | 456.63                         | 484.08 | 493.36 | 486.01 | -8.2313 | 0.9417  | 149.7484   | 153.4673               |
| 20                         | 475.43                         | 496.88 | 507.16 | 505.21 | -8.3440 | 0.9750  | 151.7987   |                        |
| 30                         | 483.23                         | 503.28 | 513.56 | 516.21 | -8.2700 | 0.9769  | 150.4525   |                        |
| 40                         | 488.43                         | 508.68 | 519.56 | 523.81 | -8.3095 | 0.9816  | 151.1711   |                        |
| 50                         | 493.23                         | 513.48 | 524.96 | 529.81 | -8.4625 | 0.9814  | 153.9545   |                        |
| 60                         | 498.43                         | 518.88 | 531.16 | 534.41 | -8.9970 | 0.9766  | 163.6785   |                        |
| 70                         | 523.03                         | 549.08 | 567.16 | 554.41 | -8.7055 | 0.92897 | 158.3753   |                        |

a: conversion rate,  $\square\beta$ : heating rate, r: correlation coefficient, E: activation energy,  $\bar{E}$ : Average activation energy.

### 3、Transparency

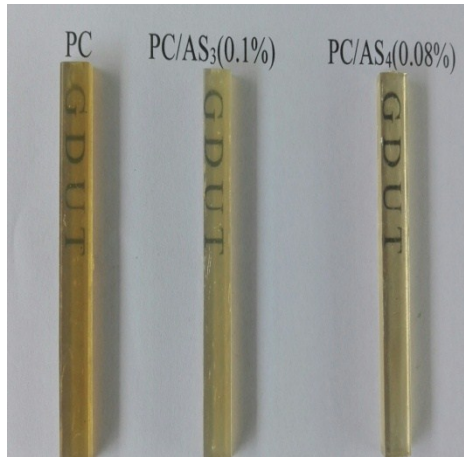

#### 4、 Digital photos of char residue

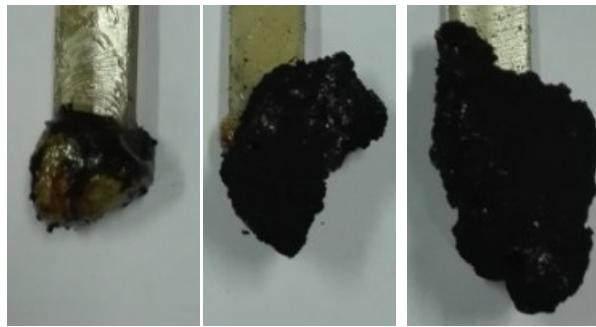

PC      PC/AS<sub>3</sub>(0.1%)      PC/AS<sub>4</sub>(0.08%)
